# Supplementary material for: Women Empowerment and Women Health in Sub Saharan Africa
Source: Research Square preprint supplement (doi:10.21203/rs.3.rs-5281312/v1), 2024-10-30
Supplement: Supplementary file 1 [file b27576d1004aaa41a276d821.docx]

## Appendix

## Table 1. 1: Regression results of Women Empowerment and health variables for SSA countries from 2008 to 2020

|  | (1) | (2) | (3) | (4) |
| --- | --- | --- | --- | --- |
| VARIABLES | WEI | WEI | WEI | WEI |
|  |  |  |  |  |
| Age 20-24 | 0.0790*** | 0.0900*** | 0.0900*** | 0.0890*** |
|  | (0.0007) | (0.0007) | (0.0007) | (0.0007) |
| Age 25-29 | 0.1080*** | 0.1220*** | 0.1220*** | 0.1210*** |
|  | (0.0007) | (0.0007) | (0.0007) | (0.0007) |
| Age 30-34 | 0.1120*** | 0.1240*** | 0.1250*** | 0.1240*** |
|  | (0.0007) | (0.0007) | (0.0007) | (0.0007) |
| Age 35-39 | 0.1090*** | 0.1200*** | 0.1210*** | 0.1190*** |
|  | (0.0008) | (0.0008) | (0.0008) | (0.0008) |
| Age 40-44 | 0.0990*** | 0.1070*** | 0.1080*** | 0.1070*** |
|  | (0.0009) | (0.0009) | (0.0008) | (0.0008) |
| Age 45-49 | 0.0887*** | 0.0934*** | 0.0946*** | 0.0940*** |
|  | (0.0009) | (0.0009) | (0.0009) | (0.0009) |
| Poorer | 0.0003 | 0.0010* | 0.0011 | 0.0001 |
|  | (0.0007) | (0.0007) | (0.0007) | (0.0007) |
| Middle | 0.0045*** | 0.0034*** | 0.0033*** | 0.0034*** |
|  | (0.0007) | (0.0007) | (0.0007) | (0.0007) |
| Richer | 0.0021*** | 0.0009 | 0.0004 | 0.0007 |
|  | (0.0007) | (0.0007) | (0.0007) | (0.0007) |
| Richest | 0.0031*** | 0.0031*** | 0.0009 | 0.0014* |
|  | (0.0007) | (0.0007) | (0.0007) | (0.0007) |
| No education | -0.0481*** | -0.0450*** | -0.0449*** | -0.0453*** |
|  | (0.0006) | (0.0006) | (0.0006) | (0.0006) |
| Incomplete primary | -0.0412*** | -0.0381*** | -0.0380*** | -0.0387*** |
|  | (0.0008) | (0.0008) | (0.0008) | (0.0008) |
| Complete primary | -0.0676*** | -0.0648*** | -0.0643*** | -0.0651*** |
|  | (0.0007) | (0.0007) | (0.0007) | (0.0007) |
| Incomplete secondary | -0.0714*** | -0.0711*** | -0.0694*** | -0.0699*** |
|  | (0.0009) | (0.0009) | (0.0009) | (0.0009) |
| Complete secondary | -0.0887*** | -0.0906*** | -0.0845*** | -0.0850*** |
|  | (0.0011) | (0.0011) | (0.0011) | (0.0011) |
| Husband no education | -0.0564*** | -0.0615*** | -0.0615*** | -0.0614*** |
|  | (0.0007) | (0.0007) | (0.0007) | (0.0007) |
| Emotional violence | -0.0780*** | -0.0818*** | -0.0818*** | -0.0816*** |
|  | (0.0008) | (0.0008) | (0.0008) | (0.0008) |
| Sexual violence | -0.0679*** | -0.0700*** | -0.0700*** | -0.0697*** |
|  | (0.0012) | (0.0012) | (0.0012) | (0.0012) |
| Help from ministry | 0.0035 | 0.0002 | 0.0008 | 0.0001 |
|  | (0.00820) | (0.00830) | (0.00832) | (0.00832) |
| **Health facility** | **0.0512***** |  |  |  |
|  | **(0.0004)** |  |  |  |
|  |  |  |  |  |
| **Health Insurance** |  | **0.0443***** |  |  |
|  |  | **(0.0010)** |  |  |
| **Medical help** |  |  | **0.0011*** |  |
|  |  |  | **(0.00063)** |  |
| **Contraception** |  |  |  | **0.0252***** |
|  |  |  |  | **(0.0011)** |
|  | (0.0012) | (0.0012) | (0.0012) | (0.0012) |
| Benin | 0.0197*** | 0.0239*** | 0.0233*** | 0.0240*** |
|  | (0.0012) | (0.0012) | (0.0012) | (0.0012) |
| Burundi | -0.0783*** | -0.0678*** | -0.0588*** | -0.0578*** |
|  | (0.0012) | (0.0012) | (0.0012) | (0.0012) |
| Chad | 0.0236*** | 0.0255*** | 0.0247*** | 0.0256*** |
|  | (0.0012) | (0.0012) | (0.0012) | (0.0012) |
| Cote D’Ivoire | -0.0116*** | -0.0050*** | -0.0047*** | -0.0053*** |
|  | (0.0015) | (0.0015) | (0.0015) | (0.0015) |
| Ethiopia | -0.0392*** | -0.0348*** | -0.0344*** | -0.0339*** |
|  | (0.0012) | (0.0012) | (0.0012) | (0.0012) |
| Gabon | 0.0072*** | 0.0005 | 0.0235*** | 0.0239*** |
|  | (0.0016) | (0.0017) | (0.0016) | (0.0016) |
| Gambia | 0.0110*** | 0.0293*** | 0.0289*** | 0.0296*** |
|  | (0.0015) | (0.0015) | (0.0015) | (0.0015) |
| Guinea | 0.0163*** | 0.0252*** | 0.0239*** | 0.0246*** |
|  | (0.0015) | (0.0016) | (0.0016) | (0.0016) |
| Kenya | -0.2920*** | -0.2960*** | -0.2940*** | -0.2940*** |
|  | (0.0009) | (0.0009) | (0.0009) | (0.0009) |
| Comoros | -0.00240 | -0.0057*** | -0.0048** | -0.0044** |
|  | (0.0010) | (0.0010) | (0.0010) | (0.0010) |
| Mali | 0.0651*** | 0.0610*** | 0.0611*** | 0.0612*** |
|  | (0.0015) | (0.0015) | (0.0015) | (0.0015) |
| Malawi | -0.0197*** | -0.0063*** | -0.0070*** | -0.0062*** |
|  | (0.0010) | (0.0010) | (0.0010) | (0.0010) |
| Mozambique | -0.0432*** | -0.0317*** | -0.0317*** | -0.0318*** |
|  | (0.0013) | (0.0013) | (0.0013) | (0.0013) |
| Nigeria | 0.0439*** | 0.0481*** | 0.0473*** | 0.0483*** |
|  | (0.0008) | (0.0008) | (0.0009) | (0.0009) |
| Namibia | -0.0588*** | -0.0580*** | -0.0527*** | -0.0524*** |
|  | (0.0015) | (0.0015) | (0.0015) | (0.0015) |
| Rwanda | -0.0747*** | -0.0625*** | -0.0639*** | -0.0636*** |
|  | (0.0001) | (0.0010) | (0.0010) | (0.0010) |
| Sierra Leone | -0.0239*** | -0.0147*** | -0.0154*** | -0.0157*** |
|  | (0.0012) | (0.0012) | (0.0012) | (0.0012) |
| Senegal | 0.0195*** | 0.0372*** | 0.0362*** | 0.0366*** |
|  | (0.0012) | (0.0012) | (0.0012) | (0.0012) |
| Togo | 0.0295*** | 0.0322*** | 0.0329*** | 0.0337*** |
|  | (0.0015) | (0.0015) | (0.0015) | (0.0015) |
| Tanzania | -0.0131*** | -0.0023* | -0.0033 | 0.0004 |
|  | (0.0013) | (0.0013) | (0.0013) | (0.0013) |
| Uganda | -0.0149*** | 0.0022* | 0.0012 | 0.0023** |
|  | (0.0012) | (0.0012) | (0.0012) | (0.0012) |
| South Africa | -0.1520*** | -0.1370*** | -0.1370*** | -0.1360*** |
|  | (0.0016) | (0.0016) | (0.0016) | (0.0016) |
| Zambia | -0.0220*** | -0.0111*** | -0.0117*** | -0.0120*** |
|  | (0.0012) | (0.0012) | (0.0012) | (0.0012) |
| Zimbabwe | -0.0023 | 0.0021** | 0.0063*** | 0.0015 |
|  | (0.0015) | (0.0015) | (0.0015) | (0.0015) |
| Constant | 0.5010*** | 0.5050*** | 0.5050*** | 0.5050*** |
|  | (0.0008) | (0.0008) | (0.0008) | (0.0008) |
| Observations | 476,957 | 476,957 | 476,957 | 476,957 |
| R-squared | 0.417 | 0.402 | 0.400 | 0.400 |

Standard errors in parentheses

*** p<0.01, ** p<0.05, * p<0.1

Source: Author’s own computation,2023

**Table 1.2: Multinomial logit results**

|  | (1) | (2) | (1) | (2) | (1) | (2) | (1) | (2) |
| --- | --- | --- | --- | --- | --- | --- | --- | --- |
| VARIABLES | Medium WEI | High WEI | Medium WEI | High WEI | Medium WEI | High WEI | Medium WEI | High WEI |
|  |  |  |  |  |  |  |  |  |
| Age 20-24 | 0.8290*** | 2.3500*** | 0.7330*** | 2.1630*** | 0.8260*** | 2.3730*** | 0.8230*** | 2.3630*** |
|  | (0.0553) | (0.0554) | (0.0557) | (0.0559) | (0.0553) | (0.0554) | (0.0553) | (0.0554) |
| Age 25-29 | 1.1810*** | 3.4960*** | 1.0750*** | 3.2820*** | 1.1750*** | 3.5230*** | 1.1670*** | 3.5120*** |
|  | (0.0845) | (0.0843) | (0.0847) | (0.0846) | (0.0844) | (0.0843) | (0.0845) | (0.0843) |
| Age 30-34 | 1.1920*** | 3.7910*** | 1.0890*** | 3.5830*** | 1.1900*** | 3.8160*** | 1.1770*** | 3.8090*** |
|  | (0.1050) | (0.1050) | (0.1050) | (0.1050) | (0.1050) | (0.1040) | (0.1050) | (0.1050) |
| Age 35-39 | 1.5500*** | 4.0960*** | 1.4600*** | 3.9190*** | 1.5490*** | 4.1170*** | 1.5310*** | 4.1080*** |
|  | (0.1300) | (0.1300) | (0.1300) | (0.1300) | (0.1300) | (0.1300) | (0.1300) | (0.1300) |
| Age 40-44 | 1.6740*** | 3.9820*** | 1.6230*** | 3.8710*** | 1.6740*** | 3.9930*** | 1.6560*** | 3.9870*** |
|  | (0.1460) | (0.1450) | (0.1460) | (0.1460) | (0.1460) | (0.1450) | (0.1460) | (0.1450) |
| Age 45-49 | 1.5020*** | 3.4530*** | 1.4740*** | 3.3910*** | 1.5040*** | 3.4540*** | 1.4790*** | 3.4400*** |
|  | (0.1270) | (0.1260) | (0.1270) | (0.1260) | (0.1270) | (0.1260) | (0.1270) | (0.1260) |
| Poorer | 0.0665 | 0.1100* | 0.0575 | 0.0930 | 0.0656 | 0.1120* | 0.0653 | 0.110* |
|  | (0.0569) | (0.0571) | (0.0570) | (0.0573) | (0.0569) | (0.0571) | (0.0569) | (0.0572) |
| Middle | 0.1260** | 0.0610 | 0.1230** | 0.0455 | 0.1260** | 0.0617 | 0.1180** | 0.0536 |
|  | (0.0571) | (0.0574) | (0.0572) | (0.0576) | (0.0571) | (0.0574) | (0.0571) | (0.0574) |
| Richer | 0.2430*** | 0.1340** | 0.2450*** | 0.1250** | 0.2430*** | 0.1360** | 0.2250*** | 0.1220** |
|  | (0.0582) | (0.0585) | (0.0584) | (0.0587) | (0.0582) | (0.0585) | (0.0583) | (0.0586) |
| Richest | 0.3210*** | 0.0959 | 0.3130*** | 0.0757 | 0.3230*** | 0.0873 | 0.2970*** | 0.0829 |
|  | (0.0612) | (0.0616) | (0.0614) | (0.0618) | (0.0613) | (0.0617) | (0.0613) | (0.0617) |
| No education | 0.0610 | -0.7180*** | 0.0049 | -0.8160*** | 0.06040 | -0.709*0** | 0.0365 | -0.7340*** |
|  | (0.0540) | (0.0541) | (0.0544) | (0.0546) | (0.0540) | (0.0541) | (0.0541) | (0.0542) |
| Incomplete primary | 0.4230*** | -0.1670** | 0.3660*** | -0.2550*** | 0.4220*** | -0.1470** | 0.3910*** | -0.1810** |
|  | (0.0737) | (0.0739) | (0.0740) | (0.0742) | (0.0737) | (0.0739) | (0.0738) | (0.0740) |
| Complete primary | 0.7410*** | -0.4080*** | 0.6820*** | -0.4980*** | 0.7410*** | -0.3870*** | 0.7020*** | -0.4240*** |
|  | (0.0543) | (0.0545) | (0.0547) | (0.0550) | (0.0542) | (0.0544) | (0.0544) | (0.0546) |
| Incomplete secondary | 0.8570*** | -0.3520*** | 0.8160*** | -0.4160*** | 0.8610*** | -0.3500*** | 0.8110*** | -0.3840*** |
|  | (0.0908) | (0.0911) | (0.0910) | (0.0914) | (0.0908) | (0.0911) | (0.0910) | (0.0913) |
| Complete secondary | 0.9090*** | -0.5040*** | 0.8450*** | -0.6230*** | 0.9180*** | -0.5390*** | 0.8520*** | -0.5460*** |
|  | (0.1320) | (0.1320) | (0.1320) | (0.1320) | (0.1330) | (0.1330) | (0.1320) | (0.1320) |
| Husband no education | 1.3590*** | 3.3020*** | 1.3090*** | 3.2090*** | 1.3580*** | 3.3050*** | 1.3610*** | 3.3070*** |
|  | (0.2530) | (0.2520) | (0.2530) | (0.2530) | (0.2530) | (0.2520) | (0.2530) | (0.2520) |
| Emotional violence | 0.6980*** | 2.4680*** | 0.5940** | 2.3200*** | 0.7020*** | 2.4800*** | 0.7110*** | 2.4880*** |
|  | (0.2450) | (0.2450) | (0.2460) | (0.2450) | (0.2450) | (0.2450) | (0.2450) | (0.2450) |
| Sexual violence | 1.3440 | 3.9580*** | 1.2870 | 3.8700*** | 1.3520 | 3.9800*** | 1.3760 | 4.0020*** |
|  | (1.0040) | (1.0020) | (1.0040) | (1.0020) | (1.0040) | (1.0020) | (1.0040) | (1.0020) |
| Help from ministry | -2.1680** | -0.5160 | -2.3910** | -0.7730 | -2.1710** | -0.5280 | -2.0740* | -0.4350 |
|  | (1.0860) | (1.0470) | (1.0880) | (1.0490) | (1.0870) | (1.0470) | (1.0950) | (1.0550) |
| **Contraception** | **0.0150** | **0.9350***** |  |  |  |  |  |  |
|  | **(0.1670)** | **(0.1660)** |  |  |  |  |  |  |
| **Health Facility** |  |  | **0.7770***** | **1.4580***** |  |  |  |  |
|  |  |  | **(0.0499)** | **(0.0501)** |  |  |  |  |
| **Health Insurance** |  |  |  |  | **0.02610** | **0.4230***** |  |  |
|  |  |  |  |  | **(0.1130)** | **(0.1130)** |  |  |
| **Medical Help** |  |  |  |  |  |  | **0.5060***** | **0.5520***** |
|  |  |  |  |  |  |  | **(0.0444)** | **(0.0448)** |
| Country Dummies | Yes | Yes | Yes | Yes | Yes | Yes | Yes | Yes |
|  |  |  |  |  |  |  |  |  |
| Observations | 454,849 | 454,849 | 454,849 | 454,849 | 454,849 | 454,849 | 454,849 | 454,849 |

Standard errors in parentheses *** p<0.01, ** p<0.05, * p<0.1

Source: Author’s own computation, 2023
